# Supplementary material for: Using CT-guided stereotactic prostate radiation therapy (CT-SPRT) to assess sustained murine prostate ablation
Source: PubMed Central journal article supplement (PMC7985301; doi:10.1038/s41598-021-86067-8), 2021-03-22
Supplement: 41598_2021_86067_MOESM2_ESM.pdf [file 41598_2021_86067_MOESM2_ESM.pdf]

# Supplementary Fig. 1

**a**

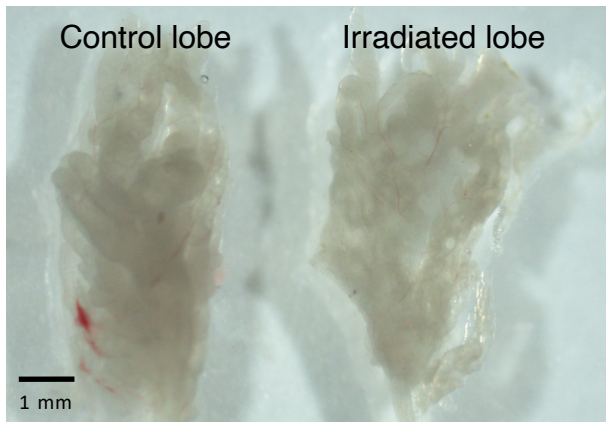

Castration/CT-SPRT/Regeneration  
*(Condition 2)*

**b**

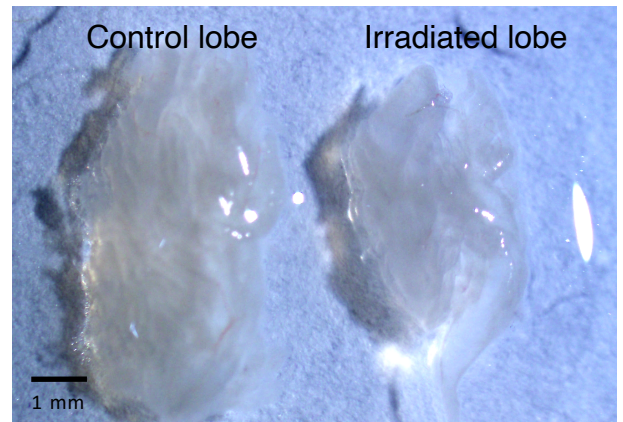

Castration/Tpulse/CT-SPRT/Regeneration  
*(Condition 3)*
